# Supplementary material
Source: publisher site journal article supplement (https://www.dovepress.com/article/507318)
Supplement: Supplementary file 1 [file 507318%20Supplementary%20Material.docx]

**Supplementary Table 1** Demographic and clinical characteristics.

| Variables | | Total  (n = 1102) | Non - severe *b* OSA  (n = 315) | Severe *c* OSA  (n = 787) | *p d* value | *p e value* |
| --- | --- | --- | --- | --- | --- | --- |
| Gender, n (%) |  | |  |  | < 0.05 | < 0.001 |
| Female | 114 (10.3) | | 61 (19.4) | 53 (6.7) |  |  |
| Male | 988 (89.7) | | 254 (80.6) | 734 (93.3) |  |  |
| Age, Median (IQR) | 41.0 (34.0-52.0) | | 48.0 (36.0-48.0) | 40.0 (34.0-49.0) | < 0.05 | < 0.001 |
| BMI *a*, Median (IQR) | 28.0 (25.9-30.7) | | 27.0 (24.5-29.1) | 28.4 (26.4-31.0) | < 0.05 | < 0.001 |
| Diabetes, n (%) | |  |  |  | > 0.05 | 0.900 |
| No | | 775 (70.3) | 223 (70.8) | 552 (70.1) |  |  |
| Yes | | 327 (29.7) | 92 (29.2) | 235 (29.9) |  |  |
| Hypertension, n (%) | |  |  |  | > 0.05 | 0.410 |
| No | | 683 (62.0) | 182 (57.8) | 501 (63.7) |  |  |
| Yes | | 419 (38.0) | 133 (42.2) | 286 (36.3) |  |  |
| Smoke | |  |  |  | > 0.05 | 0.997 |
| No | | 580 (52.6) | 178 (56.5) | 402 (51.1) |  |  |
| Yes | | 522 (47.4) | 137 (43.5) | 385 (48.9) |  |  |
| Drink | |  |  |  | > 0.05 | 0.816 |
| No | | 600 (54.4) | 185 (58.7) | 415 (52.7) |  |  |
| Yes | | 502 (45.6) | 130 (41.3) | 372 (47.3) |  |  |

*a* BMI, body mass index

*b* Non-severe OSA, AHI was ≤30 events per hour

*c* Severe OSA, AHI was >30 events per hour

*d* Univariate analyses used Mann-Whitney U tests. Multivariate analyses employed logistic regression. Two-tailed p < 0.05 was considered significant.

*e* To avoid type I errors arising from multiple comparisons, the Bonferroni correction was applied, with the significance level adjusted to 0.006 (original *α*=0.05) after correction.

**Supplementary Table 2** Thyroid function evaluation characteristics of the different groups.

| Characteristic | Non - severe OSA  (n = 233) | Severe OSA  (n = 634) | Z | *p a* value | *p b value* |
| --- | --- | --- | --- | --- | --- |
| FT3 (pmol/L) | 4.96 (4.61-5.54) | 5.39 (4.91-5.80) | -7.25 | < 0.05 | < 0.001 |
| FT4 (pmol/L) | 16.89 (15.22-18.30) | 16.88 (15.41-18.47) | -0.15 | > 0.05 | 0.883 |
| TT3 (nmol/L) | 1.73 (1.53-1.95) | 1.89 (1.65-2.12) | -6.12 | < 0.05 | < 0.001 |
| TT4 (nmol/L) | 97.40 (85.24-112.35) | 98.63 (87.01-110.43) | -0.80 | > 0.05 | 0.426 |
| TSH (mIU/L) | 2.53 (1.64-3.62) | 2.50 (1.78-3.41) | -0.27 | > 0.05 | 0.786 |
| Anti-TPO (IU/mL) | 14.50 (9.16-24.46) | 14.35 (9.00-26.06) | -0.69 | > 0.05 | 0.490 |
| Anti-TG (IU/mL) | 14.83 (10.00-20.30) | 14.70 (10.61-22.23) | -0.34 | > 0.05 | 0.732 |
| RT3 (ng/dL) | 46.80 (37.85-56.20) | 48.82 (41.46-60.13) | -2.61 | < 0.05 | 0.009 |

FT3, serum free triiodothyronine, FT4, serum free thyroxine, TT3, serum total triiodothyronine, TT4, secretes total thyroxine, TSH, serum thyroid stimulating hormone, Anti-TPO, thyroid peroxidase antibodies, Anti-TG, thyroid globulin antibodies, RT3, reverse triiodothyronine

*a* Comparisons were performed using Mann-Whitney U tests, with a significance threshold of p < 0.05 (two-tailed).

*b* To avoid type I errors arising from multiple comparisons, the Bonferroni correction was applied, with the significance level adjusted to 0.006 (original *α* = 0.05) after correction.

**Supplementary Table 3** Thyroid function evaluation characteristics in the male population of the different groups.

| Characteristic | Non - severe OSA  (n = 193) | Severe OSA  (n = 595) | Z | *p a* value | *p b value* |
| --- | --- | --- | --- | --- | --- |
| FT3 (pmol/L) | 5.05 (4.63-5.61) | 5.43 (5.01-5.83) | -6.03 | < 0.05 | < 0.001 |
| FT4 (pmol/L) | 17.09 (15.48-18.82) | 16.90 (15.48-18.50) | -0.70 | > 0.05 | 0.928 |
| TT3 (nmol/L) | 1.73 (1.53-1.96) | 1.89 (1.67-2.12) | -5.45 | < 0.05 | < 0.001 |
| TT4 (nmol/L) | 95.90 (85.13-110.00) | 98.40 (86.50-110.50) | -0.83 | > 0.05 | 0.831 |
| TSH ((mIU/L) | 2.40 (1.54-3.48) | 2.45 (1.75-3.37) | -0.97 | > 0.05 | 0.672 |
| Anti-TPO (IU/mL) | 13.90 (9.00-24.13) | 14.65 (9.00-26.13) | -1.26 | > 0.05 | 0.275 |
| Anti-TG (IU/mL) | 14.53 (10.00-18.75) | 14.74 (10.75-22.18) | -1.44 | > 0.05 | 0.055 |
| RT3 (ng/dL) | 47.50 (38.65-56.27) | 48.84 (41.60-60.34) | -2.27 | < 0.05 | > 0.001 |

FT3, serum free triiodothyronine, FT4, serum free thyroxine, TT3, serum total triiodothyronine, TT4, secretes total thyroxine, TSH, serum thyroid stimulating hormone, Anti-TPO, thyroid peroxidase antibodies, Anti-TG, thyroid globulin antibodies, RT3, reverse triiodothyronine

*a* Comparisons were performed using Mann-Whitney U tests, with a significance threshold of p < 0.05 (two-tailed).

*b* To avoid type I errors arising from multiple comparisons, the Bonferroni correction was applied, with the significance level adjusted to 0.006 (original *α* = 0.05) after correction.

**Supplementary Table 4** Thyroid function evaluation characteristics in the female population of the different groups.

| Characteristic | Non - severe OSA  (n = 40) | Severe OSA  (n = 39) | Z | *p a* value | *p b value* |
| --- | --- | --- | --- | --- | --- |
| FT3 (pmol/L) | 4.75 (4.31-5.14) | 4.75 (4.40-5.19) | -0.22 | > 0.05 | 0.825 |
| FT4 (pmol/L) | 16.05 (14.55-17.38) | 16.04 (14.60-17.52) | -0.09 | > 0.05 | 0.928 |
| TT3 (nmol/L) | 1.71 (1.53-1.94) | 1.74 (1.57-2.00) | -1.21 | > 0.05 | 0.226 |
| TT4 (nmol/L) | 106.95 (85.62-119.20) | 100.00 (89.69-110.00) | -0.21 | > 0.05 | 0.831 |
| TSH ((mIU/L) | 3.26 (2.31-5.36) | 2.72 (2.33-4.17) | -0.42 | > 0.05 | 0.672 |
| Anti-TPO (IU/mL) | 16.31 (11.15-27.75) | 11.86 (9.00-25.00) | -1.09 | > 0.05 | 0.275 |
| Anti-TG (IU/mL) | 17.30 (10.07-106.94) | 12.30 (10.00-23.76) | -1.92 | > 0.05 | 0.055 |
| RT3 (ng/dL) | 44.70 (32.60-56.10) | 48.30 (39.60-55.70) | -0.74 | > 0.05 | 0.462 |

FT3, serum free triiodothyronine, FT4, serum free thyroxine, TT3, serum total triiodothyronine, TT4, secretes total thyroxine, TSH, serum thyroid stimulating hormone, Anti-TPO, thyroid peroxidase antibodies, Anti-TG, thyroid globulin antibodies, RT3, reverse triiodothyronine

*a* Comparisons were performed using Mann-Whitney U tests, with a significance threshold of p < 0.05 (two-tailed).

*b* To avoid type I errors arising from multiple comparisons, the Bonferroni correction was applied, with the significance level adjusted to 0.006 (original *α* = 0.05) after correction.

**Supplementary Table 5** Thyroid function evaluation characteristics in the non - elderly population of the different groups.

| Characteristic | Non - severe OSA  (n = 185) | Severe OSA  (n = 596) | Z | *p a* value | *p b value* |
| --- | --- | --- | --- | --- | --- |
| FT3 (pmol/L) | 5.07 (4.67-5.61) | 5.43 (5.00-5.83) | -5.75 | < 0.05 | < 0.001 |
| FT4 (pmol/L) | 16.89 (15.48-18.26) | 16.88 (15.40-18.45) | -0.01 | > 0.05 | 0.990 |
| TT3 (nmol/L) | 1.75 (1.54-1.98) | 1.89 (1.67-2.13) | -5.18 | < 0.05 | < 0.001 |
| TT4 (nmol/L) | 96.17 (84.52-110.90) | 98.17 (86.74-110.15) | -0.66 | > 0.05 | 0.507 |
| TSH ((mIU/L) | 2.41 (1.52-3.47) | 2.45 (1.78-3.35) | -1.15 | > 0.05 | 0.251 |
| Anti-TPO (IU/mL) | 14.00 (9.25-22.27) | 14.25 (9.00-25.61) | -0.92 | > 0.05 | 0.358 |
| Anti-TG (IU/mL) | 15.35 (11.02-20.30) | 14.86 (10.78-22.36) | -0.46 | > 0.05 | 0.646 |
| RT3 (ng/dL) | 47.70 (38.40-56.80) | 48.72 (41.16-60.10) | -1.73 | > 0.05 | 0.084 |

The non-Elderly population age < 60 years old.

FT3, serum free triiodothyronine, FT4, serum free thyroxine, TT3, serum total triiodothyronine, TT4, secretes total thyroxine, TSH, serum thyroid stimulating hormone, Anti-TPO, thyroid peroxidase antibodies, Anti-TG, thyroid globulin antibodies, RT3, reverse triiodothyronine

*a* Comparisons were performed using Mann-Whitney U tests, with a significance threshold of p < 0.05 (two-tailed).

*b* To avoid type I errors arising from multiple comparisons, the Bonferroni correction was applied, with the significance level adjusted to 0.006 (original *α* = 0.05) after correction.

**Supplementary Table 6** Thyroid function evaluation characteristics in the elderly population of the different groups.

| Characteristic | Non - severe OSA  (n = 48) | Severe OSA  (n = 38) | Z | *p a* value | *p b value* |
| --- | --- | --- | --- | --- | --- |
| FT3 (pmol/L) | 4.69 (4.13-5.10) | 4.74 (4.12-5.25) | -0.65 | > 0.05 | 0.519 |
| FT4 (pmol/L) | 16.10 (14.73-19.28) | 16.91 (16.01-19.19) | -0.40 | > 0.05 | 0.689 |
| TT3 (nmol/L) | 1.68 (1.49-1.84) | 1.66 (1.41-2.00) | -0.34 | > 0.05 | 0.736 |
| TT4 (nmol/L) | 99.19 (86.86-115.98) | 102.00 (89.49-118.55) | -0.95 | > 0.05 | 0.344 |
| TSH ((mIU/L) | 3.27 (1.98-4.56) | 3.24 (1.91-5.04) | -0.33 | > 0.05 | 0.742 |
| Anti-TPO (IU/mL) | 18.75 (9.00-27.61) | 16.16 (9.97-42.97) | -0.68 | > 0.05 | 0.495 |
| Anti-TG (IU/mL) | 12.29 (10.00-21.27) | 11.71 (10.00-17.99) | -0.33 | > 0.05 | 0.739 |
| RT3 (ng/dL) | 43.90 (35.95-52.93) | 51.30 (42.90-62.40) | -2.07 | < 0.05 | 0.038 |

The non-Elderly population age ≥ 60 years old.

FT3, serum free triiodothyronine, FT4, serum free thyroxine, TT3, serum total triiodothyronine, TT4, secretes total thyroxine, TSH, serum thyroid stimulating hormone, Anti-TPO, thyroid peroxidase antibodies, Anti-TG, thyroid globulin antibodies, RT3, reverse triiodothyronine

*a* Comparisons were performed using Mann-Whitney U tests, with a significance threshold of p < 0.05 (two-tailed).

*b* To avoid type I errors arising from multiple comparisons, the Bonferroni correction was applied, with the significance level adjusted to 0.006 (original *α* = 0.05) after correction.

**Supplementary Table 7** Comparison of bilateral thyroid lobes.

| Characteristic | Left (n = 77) | Right (n = 77) | *p a* value | *p b value* |
| --- | --- | --- | --- | --- |
| The diameter of ITA (mm) | 1.40 (1.10-1.60) | 1.50 (1.20-1.70) | < 0.05 | 0.030 |
| Max - BFV (cm/s) | 26.00 (21.00-30.00) | 28.00 (22.00-35.00) | < 0.05 | 0.029 |
| Min - BFV (cm/s) | 10.00 (8.00-12.00) | 11.00 (8.00-14.00) | > 0.05 | 0.139 |
| RI | 0.61 (0.55-0.68) | 0.60 (0.56-0.68) | > 0.05 | 0.470 |
| Thyroid volume (mL) | 4.22 (3.38-6.21) | 4.98 (4.20-6.51) | < 0.05 | < 0.01 |

ITA, inferior thyroid artery, BFV, blood flow velocity, RI, resistance index

*a* Comparisons were performed using Mann-Whitney U tests, with a significance threshold of p < 0.05 (two-tailed).

*b* To avoid type I errors arising from multiple comparisons, the Bonferroni correction was applied, with the significance level adjusted to 0.01 (original *α*=0.05) after correction.

**Supplementary Table 8** Inferior thyroid artery related variables in the severe and non - severe OSA groups.

| Characteristic | Non-severe OSA  (n = 13) | Severe OSA  (n = 64) | *p a* value | *p b value* |
| --- | --- | --- | --- | --- |
| The diameter of L - ITA (mm) | 1.10 (0.85-1.40) | 1.40 (1.10-1.60) | < 0.05 | 0.024 |
| Left max - BFV (cm/s) | 26.00 (19.50-31.00) | 26.00 (21.25-30.75) | > 0.05 | 0.833 |
| Left min - BFV (cm/s) | 10.00 (6.00-10.00) | 10.00 (8.00-12.00) | > 0.05 | 0.149 |
| L - RI | 0.67 (0.58-0.69) | 0.60 (0.54-0.65) | < 0.05 | 0.041 |
| The diameter of R - ITA (mm) | 1.50 (1.15-1.70) | 1.50 (1.13-1.70) | > 0.05 | 0.989 |
| Right max - BFV (cm/s) | 30.00 (22.50-38.50) | 27.50 (22.00-34.00) | > 0.05 | 0.527 |
| Right min - BFV (cm/s) | 10.00 (8.00-14.50) | 11.00 (8.00-14.00) | > 0.05 | 0.843 |
| R - RI | 0.64 (0.56-0.71) | 0.60 (0.56-0.68) | > 0.05 | 0.358 |

L-ITA, left inferior thyroid artery, BFV, blood flow velocity, L-RI, left blood flow resistance index, R-ITA, right inferior thyroid artery, R-RI, right blood flow resistance index

*a* Comparisons were performed using Mann-Whitney U tests, with a significance threshold of p < 0.05 (two-tailed).

*b* To avoid type I errors arising from multiple comparisons, the Bonferroni correction was applied, with the significance level adjusted to 0.006 (original *α*=0.05) after correction.

**Supplementary Table 9** The power analysis of the main outcome of thyroid function in the overall population (N=867).

| Characteristic | Z | Effect size |r| | Power (1-β) |
| --- | --- | --- | --- |
| FT3 (pmol/L) | -7.25 | 0.25 | 93.83% |
| TT3 (nmol/L) | -6.12 | 0.21 | 84.89% |
| RT3 (ng/dL) | -2.61 | 0.09 | 30.48% |

FT3, serum free triiodothyronine, TT3, serum total triiodothyronine, RT3, reverse triiodothyronine.

Post-hoc power analysis indicated 30.48% power to detect medium effect sizes for RT3 differences at *α*=0.05, suggesting these findings require cautious interpretation.

**Supplementary** **Table 10** The power analysis of the main outcome of thyroid function in male population (N=788).

| Characteristic | Z | Effect size |r| | Power (1-β) |
| --- | --- | --- | --- |
| FT3 (pmol/L) | -6.03 | 0.21 | 79.68% |
| TT3 (nmol/L) | -5.45 | 0.19 | 72.40% |
| RT3 (ng/dL) | -2.27 | 0.08 | 24.13% |

FT3, serum free triiodothyronine, TT3, serum total triiodothyronine, RT3, reverse triiodothyronine.

Post-hoc power analysis indicated 24.13% power to detect small effect sizes for RT3 differences at *α*=0.05, suggesting these findings require cautious interpretation.

**Supplementary** **Table 11** The power analysis of the main outcome of thyroid function in the non-elderly population (N=781)

| Characteristic | Z | Effect size |r| | Power (1-β) |
| --- | --- | --- | --- |
| FT3 (pmol/L) | -5.75 | 0.21 | 66.60% |
| TT3 (ng/dL) | -5.18 | 0.19 | 57.35% |

FT3, serum free triiodothyronine, TT3, serum total triiodothyronine.

Post-hoc power analysis indicated 16.80% power to detect small effect sizes for RT3 differences at *α*=0.05, suggesting these findings require cautious interpretation.

**Supplementary Table 12** The power analysis of the main outcome of thyroid function in the elderly population (N=86)

| Characteristic | Z | Effect size |r| | Power (1-β) |
| --- | --- | --- | --- |
| RT3 (ng/dL) | -2.07 | 0.22 | 16.80% |

RT3, reverse triiodothyronine

**Supplementary Table 13** The power analysis of thyroid isthmus and volume in the overall population (N=383).

| Characteristic | Z | Effect size |r| | Power (1-β) |
| --- | --- | --- | --- |
| Thyroid volume (mL) | -3.46 | 0.18 | 32.84% |
| Thyroid isthmus (mm) | -2.38 | 0.12 | 18.12% |

Post-hoc power analysis indicated 32.84% and 18.12%power to detect small effect sizes for thyroid volume and thyroid isthmus differences at *α*=0.05, suggesting these findings require cautious interpretation.

**Supplementary Table 14** The power analysis of Inferior thyroid artery related variables in the overall population (N=77).

| Characteristic | Z | Effect size |r| | Power (1-β) |
| --- | --- | --- | --- |
| The diameter of L-ITA (mm) | -2.25 | 0.26 | 12.88% |
| L-RI | -2.04 | 0.23 | 11.39% |

L-ITA, left inferior thyroid artery, L-RI, left blood flow resistance index

Post-hoc power analysis indicated 12.88% and 11.39%power to detect small effect sizes for L-ITA and L-RI differences at *α*=0.05, suggesting these findings require cautious interpretation.
